# Supplementary material
Source: publisher site journal article supplement (https://zse.pensoft.net/article/4979/download/suppl/31/)
Supplement: Supplementary file 1

## Short Communication
